# Supplementary material
Source: PubMed Central journal article supplement (PMC2749248)
Supplement: NIHMS138815-supplement-1_si_001.pdf [file NIHMS138815-supplement-1_si_001.pdf]

## SUPPLEMENTARY MATERIAL

### Identification of Critical Ligand Binding Determinants in *Mycobacterium tuberculosis* APS Reductase

Jiyoung A. Hong<sup>§</sup>, Devayani P. Bhave<sup>††</sup> and Kate S. Carroll<sup>§,††,‡‡\*</sup>

<sup>§</sup>Department of Chemistry, <sup>††</sup>Chemical Biology Graduate Program and <sup>‡‡</sup>Life Sciences Institute, University of Michigan, Ann Arbor, Michigan, 48109-2216

\*Correspondence should be addressed to:

Kate S. Carroll

University of Michigan

Life Sciences Institute

210 Washtenaw Avenue

Ann Arbor, MI 48109-2216

Phone: 734-615-2739

FAX: 734-764-1075

Email: [katesc@umich.edu](mailto:katesc@umich.edu)

Running Title: Ligand Recognition in *M. tuberculosis* APS Reductase

#### Contents:

Tables S1 – S2

Figures S1 – S4

**Table S1.** Ligand dissociation constants for nitrogen-containing ligands at pH 7.5 and pH 9.0 with APS reductase.<sup>[a]</sup>

| Ligand  | Structure                                                                         | $K_d$ pH 7.5<br>[ $\mu\text{M}$ ] | $K_d$ pH 9.0<br>[ $\mu\text{M}$ ] | $\Delta\Delta G$<br>[kcal/mol] <sup>[b]</sup> | pKa                              |
|---------|-----------------------------------------------------------------------------------|-----------------------------------|-----------------------------------|-----------------------------------------------|----------------------------------|
| 5'-AMPN | 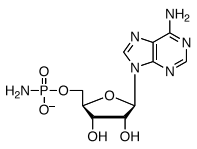 | 100                               | 82                                | -0.16                                         | 3.0 (O), 8.15 (N) <sup>[c]</sup> |
| AMPNP   |  | 257                               | 110                               | -0.53                                         | 7.7 (O), 8.25 (N) <sup>2</sup>   |
| AMPPN   |  | 410                               | 56.8                              | -1.2                                          | 3.0 (O), 8.15 (N) <sup>[c]</sup> |

<sup>[a]</sup> For ligands in this table values of  $K_i$  were determined at pH 7.5 or 9.0 under single turnover conditions from the dependence of the observed rate constant at a given inhibitor concentration under conditions of subsaturating APS, such that  $K_i$  is equal to the  $K_d$ . Each value reflects the average of at least two independent experiments, and the standard deviation was less than 15% of the value of the mean. Kinetic data were nonlinear-least squares fit to a model of competitive inhibition. <sup>[b]</sup> Energetic difference in affinity of ligand at pH 9.0 relative to pH 7.5,  $\Delta\Delta G = -RT\ln(K_d^{9.0}/K_d^{7.5})$ . <sup>[c]</sup> pKa estimate approximated from value for phosphoramidic acid<sup>3</sup>.

**Table S2.** Ligand dissociation constants for AMP and ADP with APS reductase in the presence and absence of MgCl<sub>2</sub>.<sup>[a]</sup>

| Ligand | MgCl <sub>2</sub> [mM] | K <sub>d</sub> [μM] | ΔΔG [kcal/mol] <sup>[b]</sup> |
|--------|------------------------|---------------------|-------------------------------|
| AMP    | 0                      | 5.4                 | N/A                           |
|        | 0.5                    | 21                  | 0.82                          |
|        | 2.0                    | 31                  | 1.0                           |
| ADP    | 0                      | 4.3                 | N/A                           |
|        | 0.5                    | 7.3                 | 0.32                          |
|        | 2.0                    | 20                  | 0.93                          |

<sup>[a]</sup> For ligands in this table values of  $K_i$  were determined at pH 7.5 and the concentration of MgCl<sub>2</sub> indicated under single turnover conditions from the dependence of the observed rate constant at a given inhibitor concentration under conditions of subsaturating APS, such that  $K_i$  is equal to the  $K_d$ . Each value reflects the average of at least two independent experiments, and the standard deviation was less than 15% of the value of the mean. Kinetic data were nonlinear-least squares fit to a model of competitive inhibition. <sup>[b]</sup> Energetic difference in affinity for ligand with magnesium relative to without metal ion,  $\Delta\Delta G = -RT\ln(K_d^{+MgCl_2}/K_d^{-MgCl_2})$ .

## References

1. Jaffe, E. K.; Cohn, M.  $^{31}\text{P}$  nuclear magnetic resonance spectra of the thiophosphate analogues of adenine nucleotides; effects of pH and  $\text{Mg}^{2+}$  binding. *Biochemistry* **1978**, 17, 652-7.
2. Reynolds, M. A.; Gerlt, J. A.; Demou, P. C.; Oppenheimer, N. J.; Kenyon, G. L. N-15 and O-17 NMR-studies of the proton binding-sites in imidodiphosphate, tetraethyl imidodiphosphate, and adenylyl imidodiphosphate. *J. Am. Chem. Soc.* **1983**, 105, 6475-81.
3. Chanley, J. D.; Feageson, E. A study of hydrolysis of phosphoramides .2. Solvolysis of phosphoramidic acid and comparison with phosphate esters. *J. Am. Chem. Soc.* **1963**, 85, 1181-90.

## Figure Legends

**Figure S1.** Structure based sequence alignment of APS reductases from *Pseudomonas aeruginosa*, *Mycobacterium tuberculosis* and *Saccharomyces cerevisiae*. The ClustalW Multiple Sequence Alignment program was used. Strictly conserved residues are outlined in red, red letters indicate conserved residues and conserved regions are boxed in blue. Alignment picture was rendered with the server ESPript 2.2 (<http://esript.ibcp.fr>).

**Figure S2.** The apparent affinity,  $K_{1/2}$ , of APS reductase in single turnover experiment. The affinity of APS reductase (E) for APS was determined from the dependence of the observed rate constant for *S*-sulfo cysteine formation on protein concentration according to:

$$K_{obs} = K_{max} \times \left( \frac{[E]}{K_{1/2} + [E]} \right)$$
 In this equation,  $k_{obs}$  is the observed rate constant at a particular protein concentration,  $k_{max}$  is the maximal rate constant with saturating protein, and  $K_{1/2}$  is the protein concentration that provides half the maximal rate. Because the chemical step is rate-determining for *S*-sulfo cysteine formation,  $k_{max}$  is equal to the rate constant for the reaction of the E•APS complex, and  $K_{1/2}$  is equal to the dissociation constant ( $K_d$ ) of APS for APS reductase. The concentration of active protein was determined by direct titration with a high concentration of APS (*i.e.*  $[APS] \gg K_d$ ).

**Figure S3.** pH dependence for ADPβS (A) and AMPS (B) binding. The association equilibrium constant, ( $K_a = 1/K_d$ ) is plotted as a function of pH. Values of  $K_d$  were determined by inhibition of APS reduction (pH 6.0-9.5). See methods for details. (A) The pH dependence for ADPβS binding. Nonlinear-least-squares fit of the data to a model for a single ionization gave  $pK_a$

values of  $5.8 \pm 0.15$ . The  $pK_a$  of ADP $\beta$ S in solution is  $5.2^1$ . (B) The pH dependence for AMPS binding. The dashed line represents the best fit of a model for a single ionization and yields a  $pK_a$  of  $7.7 \pm 0.15$ . The  $pK_a$  of AMPS in solution is  $5.3^1$ .

**Figure S4.** The radioactive assay for APS reductase. (A) The reaction progress curve for APS reductase. Under the subsaturating concentration of substrate, the reaction is described by the apparent second-order rate constant,  $k_{cat}/K_m$ , which under the conditions of this assay is  $\sim 2 \times 10^6$   $M^{-1}s^{-1}$ . (B) AMP inhibits APS reductase activity. Nonlinear least squares fit to a model of competitive inhibition gives a  $K_d$  value of  $5.4 \mu M$ .

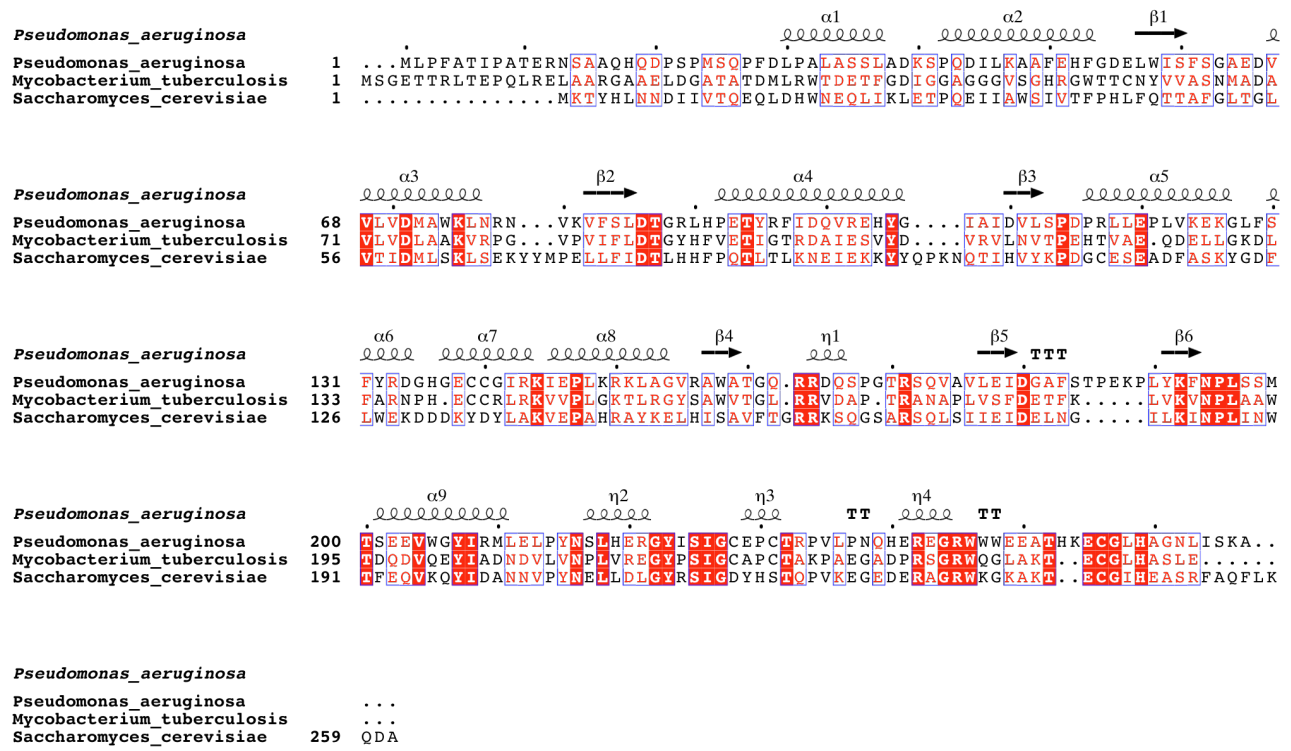

Figure S1

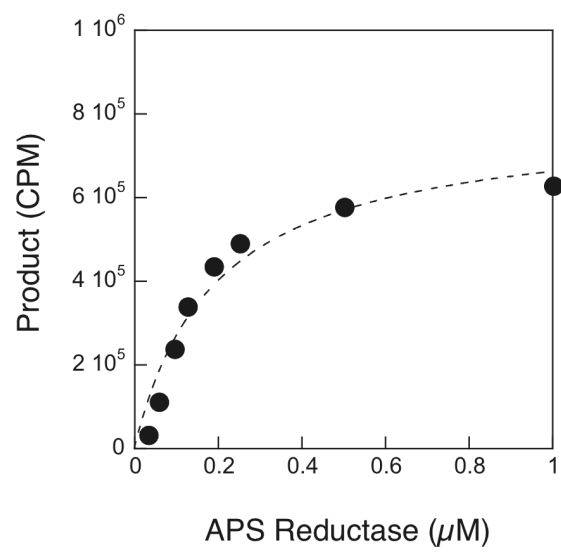

Figure S2



A

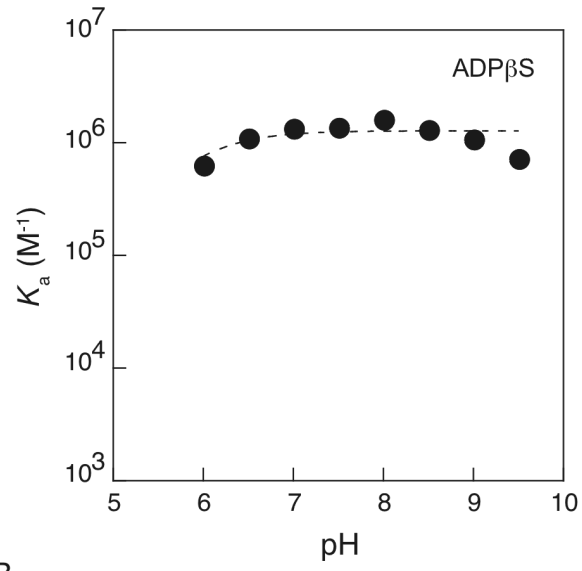

B

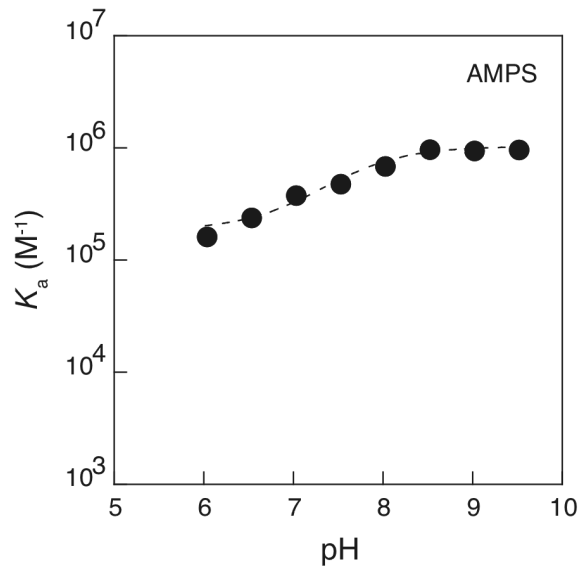

Figure S3

A

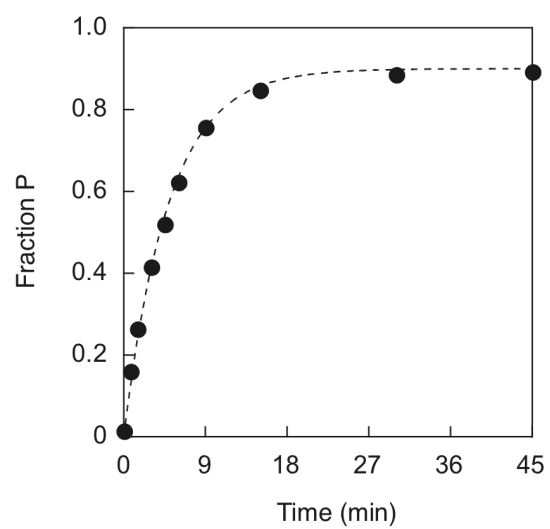

B

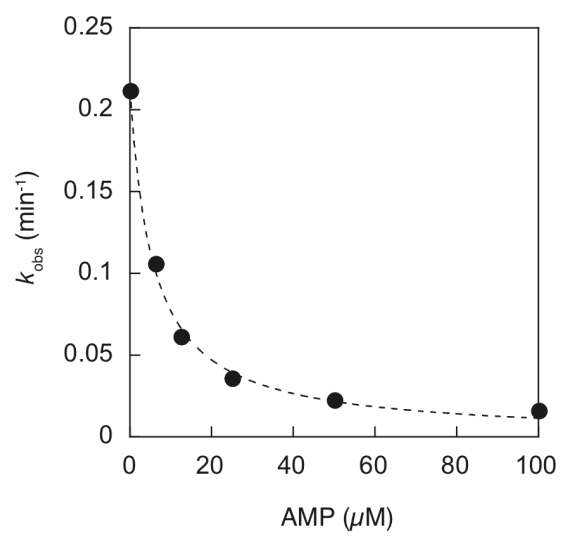

Figure S4
